# Supplementary material
Source: PubMed Central journal article supplement (PMC6445198)
Supplement: Supp_Fig1.pdf [file Supp_Fig1.pdf]

## Supplementary Data

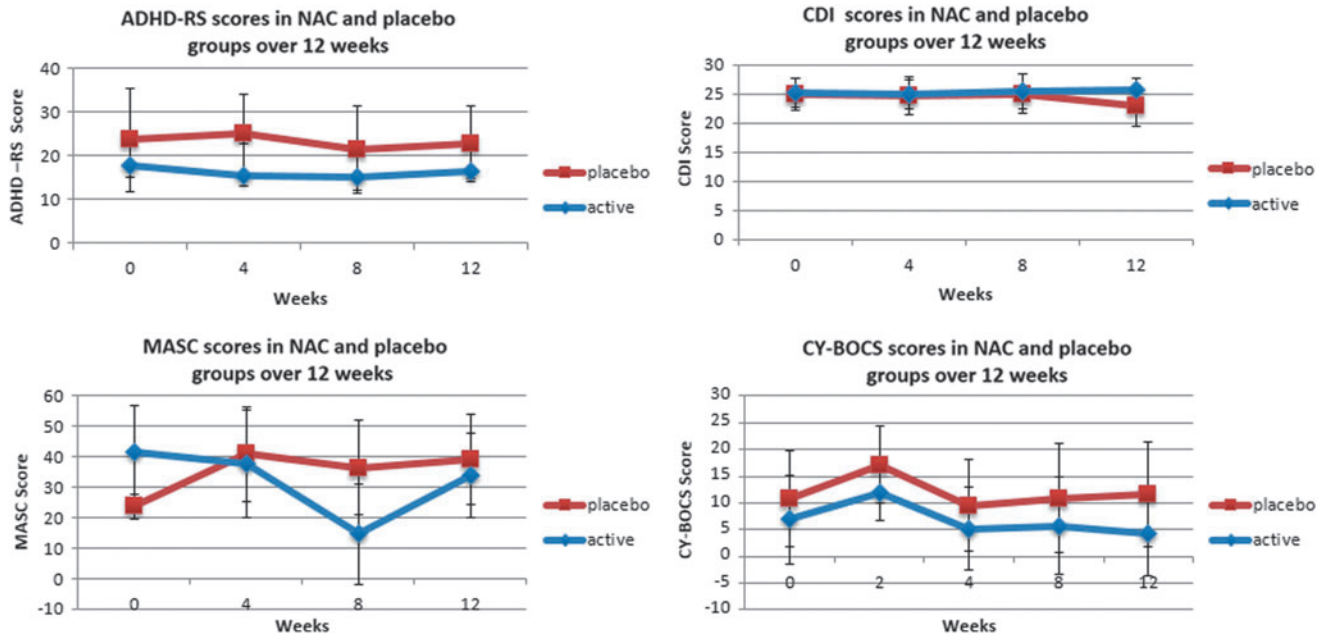

**SUPPLEMENTARY FIG S1.** Effects of N-Acetylcysteine (NAC) and placebo on comorbid conditions (Attention-Deficit/Hyperactivity Disorder Rating Scale (ADHD-RS), Child Depression Inventory (CDI), Multidimensional Anxiety Scale for Children (MASC) and Children's Yale-Brown Obsessive Compulsive Scale (CY-BOCS)). There were statistically significant differences between groups in baseline ADHD and anxiety symptom severity. NAC did not demonstrate a statistically significantly improvement in ADHD, OCD, anxiety or depressive symptoms over time compared to placebo.
